# Supplementary material
Source: PubMed Central journal article supplement (PMC5389922)
Supplement: NIHMS840961-supplement-Supp_info.pdf [file NIHMS840961-supplement-Supp_info.pdf]

**Recognition of HIV-Inactivating Peptide Triazoles by a recombinant soluble trimer,  
BG505 SOSIP.664**

**Kriti Acharya<sup>1,ϕ</sup>, Adel A. Rashad<sup>1,ϕ</sup>, Francesca Moraca<sup>2</sup>, Per Johan Klasse<sup>3</sup>, John P.  
Moore<sup>3</sup>, Cameron Abrams<sup>2</sup>, Irwin Chaiken<sup>1\*</sup>**

<sup>1</sup>Department of Biochemistry and Molecular Biology, Drexel University, Philadelphia,  
Pennsylvania 19102

<sup>2</sup> Department of Chemical and Biological Engineering, Drexel University, Philadelphia,  
Pennsylvania 19104

<sup>3</sup> Department of Microbiology and Immunology, Weill Medical College of Cornell  
University, New York, New York, 10065

<sup>ϕ</sup> Equal contributing authors

**Supplementary Information**

**Table S1.** Percentage of contacts among **1**, **2** and **3** with subsite 1 and subsite 2 residues over their respective 50 ns MD trajectories.

| PT       | <i>Per-residue contact %</i> |      |           |      |      |      |
|----------|------------------------------|------|-----------|------|------|------|
|          | Subsite 1                    |      | Subsite 2 |      |      |      |
|          | T257                         | S375 | I109      | W112 | F210 | M426 |
| <b>1</b> | 31.7                         | 1.4  | 71.0      | 99.3 | 99.1 | 99.9 |
| <b>2</b> | 97.6                         | 0.1  | 41.4      | 99.8 | 76.9 | 66.3 |
| <b>3</b> | 11.6                         | 0    | 99.7      | 99.0 | 48.8 | 97.8 |

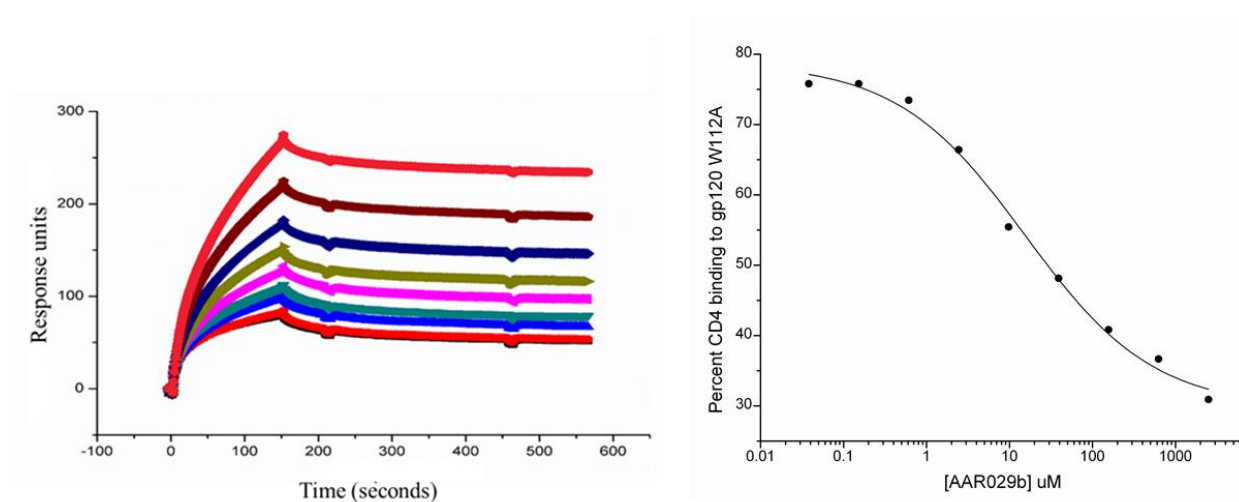

**Figure S1.** (Left) SPR sensograms resulting from dose dependent inhibition of CD4 binding to immobilized monomeric gp120 mutant protein W112A by peptide 2. The data show ~ 500-fold decrease in potency ( $IC_{50}$ : 15  $\mu$ M) compared to the previously calculated<sup>10</sup>  $IC_{50}$  (32 nM) value with the wild-type monomeric gp120 protein. (Right) Dose response curve for gp120-W112A binding to CD4 in the presence of increasing concentrations of peptide 2.
